# Supplementary material
Source: Springer Nature journal article supplement (https://www.springermedizin.de/resource/supplementary/13054_2013_2097_MOESM2_ESM.pdf/9711606)

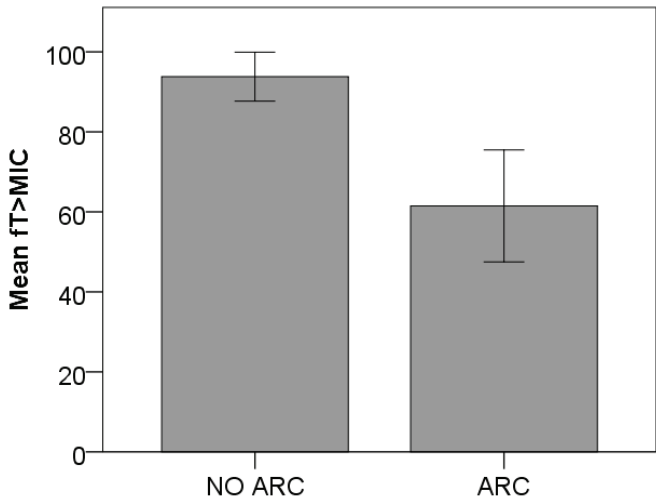

Supplement: MOESM2 [file 9711606]
